# Supplementary material
Source: publisher figshare collection journal article supplement (https://acs.figshare.com/ndownloader/files/17999816)
Supplement: Supplementary file 1 [file 17999816]

## Sheet: 1A, Down>2x, p<0.05
Supplemental Dataset 1A: Downregulated gene expression tables of WT treated HC104A compared to DMSO
Gene	Counts per million (CPM)				WT DMSO/ WT HC104A
	WT_DMSO1	WT_DMSO2	WT_HC104A1	WT_HC104A2	Fold change	log2 Fold change	logCPM	Adjusted p-value	Rv number	Gene name	Annotated function
MT2090	34556.6	40794.6	225.091	160.426	0.00511651	-7.61062	13.5836	2.67e-17	Rv2031c	hspX	heat shock protein
MT2089	10989.5	5332.18	73.8927	63.8677	0.00844121	-6.88833	11.8071	9.03e-14	Rv2030c	Rv2030c	conserved hypothetical protein
MT2088	2009.02	1084.05	35.8371	27.0791	0.0203467	-5.61906	9.30952	2.66e-14	Rv2029c	pfkB
MT2087	565.75	208.12	10.7938	10.6853	0.0277699	-5.17033	7.57682	1.57e-12	Rv2028c	Rv2028c	conserved hypothetical protein
MT1780	11882.1	9299.91	710.343	427.899	0.0537373	-4.21793	11.8767	2.4e-07	Rv1738	Rv1738	conserved hypothetical protein
MT2703	1189.42	694.218	134.304	90.5077	0.119358	-3.06663	8.39935	0.000102214	Rv2628	Rv2628	hypothetical protein
MT2634	1071.96	890.072	148.809	133.346	0.143815	-2.79771	9.29075	2.59e-08	Rv2557	Rv2557	conserved hypothetical protein
MT2218	646.961	414.715	70.565	87.6291	0.149	-2.74661	8.74333	1.12e-08	Rv2159c	Rv2159c	hypothetical protein
MT0911	171.311	294.542	35.6238	34.3978	0.15034	-2.7337	7.4632	9.37e-05	Rv0888	Rv0888	possible membrane protein
MT2052	9605.31	4994.95	1495.69	732.405	0.152608	-2.7121	11.3138	0.00343474	Rv1996	Rv1996	conserved hypothetical protein
MT1778	8887.94	3684.06	1142.05	797.834	0.154303	-2.69616	11.3632	0.00443538	Rv1736c	narX	fused nitrate reductase
MT1779	2582.56	1008.3	320.913	242.005	0.156767	-2.67331	9.64426	0.00234141	Rv1737c	narK2	nitrite extrusion protein
MT2218.1	343.551	179.151	48.1668	57.8176	0.202748	-2.30224	7.78058	2.69e-06	Rv2160c	Rv2160c	hypothetical protein
MT0356	1454.25	581.669	275.477	139.689	0.20393	-2.29386	8.88611	0.000277061	Rv0341	Rv0341	conserved hypothetical protein
MT2091	6234.69	5325.74	1440.65	959.772	0.207643	-2.26782	11.158	0.00187554	Rv2032	Rv2032	conserved hypothetical protein
MT0908	1440.72	968.385	253.377	252.446	0.209965	-2.25178	11.0139	8.36e-05	Rv0885	Rv0885	unknown transmembrane protein
MT3216	28777.6	18951.9	5967.01	4137.89	0.211712	-2.23983	13.2027	0.0256527	Rv3130c	Rv3130c	conserved hypothetical protein
MT0602	278.489	249.079	67.1946	51.6699	0.22534	-2.14982	6.78601	5.21e-05	Rv0574c	Rv0574c	conserved hypothetical protein
MT0399	254.149	188.438	51.0252	49.5231	0.227193	-2.13801	7.36111	4.59e-07	Rv0386	Rv0386	transcriptional regulator (LuxR/UhpA family)
MT2701	26619.7	17627.7	6197.01	4008.1	0.230638	-2.1163	12.9977	0.028913	Rv2626c	Rv2626c	conserved hypothetical protein
MT1106	219.41	280.681	50.9826	64.8436	0.231613	-2.11021	7.39958	2.4e-07	Rv1076	lipU	probable esterase
MT3607	128.265	85.036	29.7789	20.9802	0.238038	-2.07074	6.12749	0.000654423	Rv3503c	fdxD	probable ferredoxin
MT1297	149.933	79.0759	25.4273	29.1284	0.238174	-2.06991	6.06495	2.61e-06	Rv1258c	Rv1258c	probable multidrug resistance pump
MT2700	4427.24	2065.33	1050.37	513.723	0.240907	-2.05345	10.4558	0.0384141	Rv2625c	Rv2625c	conserved hypothetical protein
MT0846	13685	10145	4162.1	2102.41	0.262884	-1.9275	12.7027	0.0440889	Rv0824c	desA1	acyl-[ACP] desaturase
MT1264	89.4023	45.1862	20.521	14.8813	0.263108	-1.92627	5.88709	0.00269445	Rv1226c	Rv1226c	possible membrane protein
MT1003.1	247.642	208.536	82.2547	39.0818	0.266028	-1.91035	8.04669	0.0372395	Rv0976c	Rv0976c	hypothetical protein
MT0845	3630	2211.77	1052.08	521.334	0.269341	-1.8925	10.8332	0.0429097	Rv0823c	Rv0823c	transcriptional regulator (NifR3/Smm1 family)
MT0894	1243.15	646.537	302.738	211.168	0.271959	-1.87854	9.40083	0.00219534	Rv0872c	PE_PGRS	PE_PGRS-family protein
MT2635	474.314	349.916	111.138	119.343	0.279633	-1.83839	8.52354	0.00126571	Rv2558	Rv2558	conserved hypothetical protein
MT3814	815.599	388.657	174.365	162.816	0.279991	-1.83655	8.73417	0.00419902
MT1591	761.342	396.211	194.16	137.835	0.286816	-1.8018	8.57488	0.00600949	Rv1539	lspA	lipoprotein signal peptidase
MT3171	420.464	381.796	122.785	107.487	0.287044	-1.80065	7.61672	0.000595353	Rv3086	adhD	zinc-containing alcohol dehydrogenase
MT1882	140.116	62.8588	30.9735	28.0062	0.290573	-1.78303	5.86522	0.00427012	Rv1834	Rv1834	conserved hypothetical protein
MT0265	197.8	281.513	81.0175	58.3543	0.290836	-1.78172	7.60166	0.00070419	Rv0251c	hsp	possible heat shock protein
MT3165	624.247	331.065	190.15	106.267	0.310297	-1.68828	8.37645	0.0438432	Rv3080c	pknK	serine-threonine protein kinase
MT2786	365.335	218.654	95.8217	86.4581	0.312129	-1.67978	7.67092	0.00119743	Rv2713	Rv2713	probable dehydrogenase
MT3173	250.838	223.02	74.9167	73.6748	0.313592	-1.67304	6.91309	0.00247064
MT1797	130.589	158.914	39.0795	51.7675	0.31381	-1.67204	6.68714	0.00219534
MT0595	194.605	175.963	62.331	55.866	0.31899	-1.64842	6.50854	0.00105598	Rv0569	Rv0569	conserved hypothetical protein
MT1659	3429.18	2108.09	1219.44	547.974	0.319189	-1.64752	10.8807	0.0376657	Rv1623c	appC	cytochrome bd-II oxidase subunit I
MT1105	277.734	130.084	81.6148	49.2304	0.320868	-1.63995	7.31219	0.015374	Rv1075c	Rv1075c	conserved hypothetical protein
MT2600	5721.4	6286.85	2082.39	1820.84	0.325047	-1.62128	11.6509	0.0108189	Rv2524c	fas	fatty acid synthase
MT0601	131.751	103.471	43.1752	33.2756	0.325079	-1.62114	5.75679	0.000199003	Rv0573c	Rv0573c	conserved hypothetical protein
MT0912	375.094	156.073	94.1578	81.0422	0.329837	-1.60017	7.67377	0.0211369	Rv0889c	citA	citrate synthase 2
MT1093	234.34	106.52	67.024	46.2053	0.332205	-1.58985	6.96926	0.0449686	Rv1063c	Rv1063c	conserved hypothetical protein
MT0546	689.774	355.183	196.55	152.961	0.334477	-1.58002	8.63048	0.0139268	Rv0524	hemL	glutamate-1-semialdehyde aminotransferase
MT3172	236.024	175.201	70.5224	68.3565	0.337729	-1.56606	6.80809	0.0204412	Rv3087	Rv3087	conserved hypothetical protein
MT3969	1484.69	2057.5	488.196	717.378	0.340347	-1.55492	10.1197	0.0153317	Rv3854c	Rv3854c	probable monooxygenase
MT2655	57.9169	32.9194	12.7563	18.5407	0.344271	-1.53838	5.4599	0.00245847	Rv2578c	Rv2578c	hypothetical protein
MT0909	123.095	90.5111	33.9173	40.7407	0.349457	-1.51681	7.93439	0.00110153	Rv0886	fprB	ferredoxin, ferredoxin-NADP reductase
MT0596	1404.41	1164.1	465.669	436.34	0.351182	-1.50971	9.16025	0.0122711	Rv0570	nrdZ	ribonucleotide reductase, class II
MT1327	144.298	95.5703	44.8817	39.3745	0.351269	-1.50935	6.39272	0.00375891	Rv1289	Rv1289	hypothetical protein
MT3088	140.174	65.7695	39.6342	33.5196	0.355209	-1.49326	6.28321	0.030924	Rv3008	Rv3008	hypothetical protein
MT3170	57.4521	56.6214	19.7957	20.8339	0.356203	-1.48923	4.49923	0.000105462	Rv3085	Rv3085	short chain alcohol dehydrogenase
MT2086	255.427	158.152	80.0363	67.2831	0.356212	-1.48919	7.05806	0.00492459	Rv2027c	Rv2027c	sensor histidine kinase
MT1592	369.053	206.734	107.639	98.7047	0.358366	-1.4805	7.91919	0.0161145	Rv1540	Rv1540	conserved hypothetical protein
MT2250	2185.62	1435.08	691.742	610.671	0.359714	-1.47508	10.5084	0.0410546	Rv2194	qcrC	cytochrome b/c component of ubiQ-cytB reductase
MT3169	60.1243	58.7005	21.8862	21.1754	0.362472	-1.46406	4.55822	0.000263132	Rv3084	lipR	probable acetyl-hydrolase
MT3850	69.8255	117.262	33.4907	34.7882	0.365098	-1.45364	5.93975	0.000587541	Rv3742c	Rv3742c	possible monooxygenase-b
MT3591	159.286	262.87	68.7305	86.5069	0.367754	-1.44319	7.78347	0.00817876	Rv3487c	lipF	probable esterase
MT2569	242.995	164.597	75.8979	74.6994	0.369473	-1.43646	7.3789	0.00639532
MT2716	62.3318	41.8596	21.7156	17.5161	0.376575	-1.40899	5.51914	0.00204499	Rv2638	Rv2638	conserved hypothetical protein
MT0410	211.336	94.3228	56.4008	58.7447	0.37667	-1.40863	7.03138	0.0178702	Rv0400c	fadE7	acyl-CoA dehydrogenase
MT0335	5.80911	6.7918	2.85844	1.85407	0.376705	-1.40849	2.16061	0.00259621	Rv0320	Rv0320	conserved hypothetical protein
MT0549	63.3774	40.2656	19.3265	20.0532	0.379854	-1.39648	5.56536	0.00351969
MT1210	667.758	414.438	183.58	228.928	0.381165	-1.39151	8.91478	0.0161145	Rv1173	Rv1173	conserved hypothetical protein
MT2061	1656.7	2117.17	748.356	690.982	0.3814	-1.39062	9.74871	0.0456823	Rv2005c	Rv2005c	conserved hypothetical protein
MT3441	115.892	71.0366	33.6613	37.862	0.382539	-1.38632	7.10879	0.00375981	Rv3338	Rv3338	conserved hypothetical protein
MT0278	227.427	129.46	72.3995	65.4778	0.386324	-1.37212	7.12526	0.0180129	Rv0265c	fecB2	iron transport protein FeIII dicitrate transporter
MT0547	102.124	69.9971	33.576	33.0317	0.386943	-1.36981	6.32255	0.00264516
MT0550	340.879	205.279	116.897	95.6308	0.389135	-1.36166	7.76449	0.0109306	Rv0528	Rv0528	probable membrane protein
MT0357	749.376	457.337	297.022	173.111	0.38961	-1.3599	8.37126	0.0138442	Rv0342	Rv0342	conserved hypothetical protein
MT1774	1869.49	2195.34	902.968	683.419	0.390276	-1.35743	9.7699	0.0433045	Rv1733c	Rv1733c	possible membrane protein
MT0548	165.269	141.38	66.768	53.3288	0.391689	-1.35222	6.94052	0.00174141	Rv0526	Rv0526	conserved hypothetical protein
MT3073	353.368	231.614	107.341	122.076	0.392155	-1.3505	7.85554	0.00822613	Rv2995c	leuB	3-isopropylmalate dehydrogenase
MT3718	3934.4	4206.27	1353.32	1844.8	0.392857	-1.34792	11.3884	0.0391399	Rv3616c	Rv3616c	conserved hypothetical protein
MT1515	82.199	86.6993	31.1015	35.3249	0.39331	-1.34626	6.38464	0.00586469	Rv1469	ctpD	probable cadmium-transporting ATPase
MT3606	148.771	88.7092	54.4383	38.9842	0.393417	-1.34587	6.5744	0.0428184	Rv3502c	Rv3502c	putative dehydrogenase
MT3776	298.124	182.131	86.1798	103.681	0.395289	-1.33902	7.53394	0.00419902	Rv3675	Rv3675	hypothetical protein
MT0763	35.4356	25.7811	11.2631	12.9785	0.395712	-1.33748	4.83485	0.00110153	Rv0738	Rv0738	possible membrane protein
MT2216	219.701	164.458	72.9542	81.3838	0.401738	-1.31567	7.47529	0.0146811	Rv2157c	murF	D-alanine:D-alanine-adding enzyme
MT2568	115.485	57.1065	36.2211	33.178	0.402045	-1.31457	6.24412	0.0194744	Rv2493	Rv2493	conserved hypothetical protein
MT0808	108.282	117.748	51.7932	39.3745	0.403435	-1.30959	6.51451	0.0236022	Rv0784	Rv0784	conserved hypothetical protein
MT2326	4.5892	2.77216	1.66387	1.31736	0.405014	-1.30396	1.47895	0.0217823
MT2028	43.9169	22.7317	13.6096	13.4176	0.405361	-1.30272	4.76636	0.026318	Rv1976c	Rv1976c	hypothetical protein
MT0515	551.052	293.572	194.416	147.984	0.405388	-1.30262	8.19513	0.0301569	Rv0495c	Rv0495c	conserved hypothetical protein
MT1658	631.334	475.703	288.19	161.304	0.406051	-1.30027	8.78761	0.0423218	Rv1622c	cydB	cytochrome d ubiquinol oxidase subunit II
MT1848	41.1866	39.8498	14.5482	18.4919	0.407611	-1.29474	4.63583	0.00303348	Rv1799	lppT	probable lipoprotein
MT0656	148.307	70.205	46.5456	42.546	0.407679	-1.29449	6.52286	0.034172	Rv0628c	Rv0628c	conserved hypothetical protein
MT0276	127.684	69.5812	33.7893	46.7908	0.408328	-1.2922	6.48695	0.00950974	Rv0263c	Rv0263c	conserved hypothetical protein
MT3168	278.547	278.117	115.873	111.537	0.408541	-1.29145	6.82279	0.00149358	Rv3083	Rv3083	probable monooxygenase
MT2217	316.48	214.773	104.61	113.147	0.409872	-1.28676	8.08504	0.00932379	Rv2158c	murE	meso-diaminopimelate-adding enzyme
MT1095	217.667	180.745	89.6781	73.9675	0.410769	-1.2836	7.39128	0.0131243	Rv1065	Rv1065	conserved hypothetical protein
MT1214	1479.52	1830.87	785.814	580.225	0.412659	-1.27698	9.97115	0.034172	Rv1177	fdxC	ferredoxin 4Fe-4S
MT2752	367.601	195.368	127.947	104.999	0.413776	-1.27308	7.85254	0.032484	Rv2678c	hemE	uroporphyrinogen decarboxylase
MT1840	469.202	684.793	227.822	250.885	0.414839	-1.26938	8.90594	0.018262	Rv1791	PE	PE-family protein
MT2042	275.178	179.082	85.0705	103.73	0.415577	-1.26681	7.4619	0.00747141	Rv1988	Rv1988	possible rRNAmethyltransferase
MT1452	612.164	409.102	235.458	189.456	0.41607	-1.2651	8.43251	0.0133147	Rv1408	rpe	ribulose-phosphate 3-epimerase
MT0673	166.431	189.061	71.8876	76.7974	0.418277	-1.25747	7.0018	0.00375981	Rv0645c	mmaA1	methoxymycolic acid synthase 1
MT0772.5	116.415	86.838	46.4603	38.5939	0.418489	-1.25674	6.32189	0.00497617
MT3144	181.941	179.983	74.746	77.3341	0.420211	-1.25081	7.10471	0.00343474	Rv3058c	Rv3058c	putative transcriptional regulator
MT3183	747.691	564.759	307.261	244.542	0.420443	-1.25002	8.88202	0.0141668	Rv3099c	Rv3099c	hypothetical protein
MT1823	119.319	100.283	55.5902	37.1789	0.42255	-1.2428	6.45948	0.00375981	Rv1773c	Rv1773c	transcriptional regulator (IclR family)
MT2428	365.509	304.314	145.524	138.128	0.423477	-1.23965	7.94933	0.00950559
MT1009	233.643	158.429	86.2651	80.8471	0.426212	-1.23036	7.38217	0.00696752	Rv0981	Rv0981	two-component response regulator
MT0102	61.9251	38.9489	22.1849	20.8339	0.426385	-1.22977	5.47212	0.0151067	Rv0093c	Rv0093c	hypothetical protein
MT2912	960.537	849.044	497.923	275.622	0.427486	-1.22605	9.34597	0.0376657	Rv2846c	efpA	putative efflux protein
MT1545	520.206	363.43	178.588	200.727	0.429251	-1.22011	8.49572	0.0131243	Rv1497	lipL	esterase
MT3883	593.924	454.357	213.018	242.883	0.434892	-1.20127	8.70565	0.0140205	Rv3774	echA21	enoyl-CoA hydratase/isomerase superfamily
MT1974	564.181	365.232	231.32	174.624	0.436779	-1.19502	8.44537	0.0412482	Rv1923	lipD	probable esterase
MT2751	107.527	69.7199	40.4448	36.9838	0.436805	-1.19494	6.29834	0.0148855	Rv2677c	hemY'	protoporphyrinogen oxidase
MT2242	586.546	589.916	261.611	252.934	0.437374	-1.19306	8.82037	0.0138415	Rv2187	fadD15	acyl-CoA synthase
MT2306	1479.29	1704.05	799.211	595.692	0.438196	-1.19035	10.051	0.0423218
MT0409	159.634	114.975	60.0699	60.5987	0.439386	-1.18644	6.72184	0.0100592	Rv0399c	lpqK	possible PBP
MT1836	74.1243	78.7294	37.0744	30.3969	0.44155	-1.17935	6.00944	0.0106032	Rv1787	PPE	PPE-family protein
MT0077	40.8962	16.633	12.5003	13.0761	0.444202	-1.17071	4.36564	0.0492384	Rv0071	Rv0071	group II intron maturase
MT3074	272.622	199.526	95.4377	114.318	0.444225	-1.17064	7.6337	0.0184556	Rv2996c	serA	D-3-phosphoglycerate dehydrogenase
MT1283	248.049	141.172	89.5928	84.0673	0.446152	-1.16439	7.73707	0.049961	Rv1245c	Rv1245c	putative dehydrogenase
MT1124	161.9	115.876	67.5359	57.4761	0.450052	-1.15184	6.74217	0.0373198	Rv1092c	coaA	pantothenate kinase
MT2273	437.426	282.345	177.223	153.79	0.459883	-1.12066	8.13318	0.0449686	Rv2216	Rv2216	conserved hypothetical protein
MT3849	53.2696	86.9766	32.5094	32.0558	0.460608	-1.11839	5.54616	0.0122711	Rv3741c	Rv3741c	possible monooxygenasemonoxygenase-a
MT3884	209.186	166.538	78.5857	96.1187	0.464933	-1.10491	7.34096	0.0138564	Rv3775	lipE	probable hydrolase
MT3497	207.618	281.444	113.399	114.611	0.466259	-1.1008	7.6042	0.0277965	Rv3390	lpqD	lipoprotein
MT1438	161.145	131.955	66.512	71.04	0.469277	-1.09149	6.98278	0.0206517	Rv1393c	Rv1393c	FAD-containing monooxygenase
MT2546	149.178	102.431	67.6639	50.7917	0.470811	-1.08678	6.52175	0.0421522	Rv2470	glbO	hemoglobin-like, oxygen carrier
MT1525	95.3856	124.817	36.5624	67.3807	0.471989	-1.08317	6.59998	0.0484834
MT1108	384.621	315.333	166.6	165.012	0.473758	-1.07778	8.16769	0.0207348	Rv1077	cysM2	cystathionine [beta]-synthase
MT0994	214.937	139.301	84.0893	84.5552	0.476032	-1.07087	7.20941	0.0217823	Rv0966c	Rv0966c	conserved hypothetical protein
MT1691	178.63	102.362	63.1416	70.7961	0.476566	-1.06925	6.88447	0.0279243
MT1096	10.4564	7.06901	3.07175	5.31825	0.476567	-1.06925	3.6668	0.0373198
MT0277	60.1243	42.8992	20.6917	28.4941	0.477113	-1.0676	5.617	0.017679	Rv0264c	Rv0264c	conserved hypothetical protein
MT1097	8.07467	11.9203	4.73562	4.78154	0.477379	-1.06679	2.86647	0.0161145	Rv1068c	PE_PGRS	PE_PGRS-family protein
MT3839	320.954	305.631	146.548	152.619	0.477459	-1.06655	8.02404	0.01942	Rv3734c	Rv3734c	conserved hypothetical protein
MT3726	290.862	263.633	127.478	138.323	0.47935	-1.06085	7.75396	0.0217823	Rv3624c	hpt	probable hypoxanthine-guanine
MT3462	57.5102	39.9884	21.9716	24.7859	0.479372	-1.06078	5.93164	0.0229642	Rv3354	Rv3354	conserved hypothetical protein
MT2323	57.5683	45.6714	26.6219	23.5662	0.486146	-1.04054	5.27146	0.032484	Rv2263	Rv2263	possible oxidoreductase
MT3720	36.5393	37.4242	16.596	19.3701	0.486218	-1.04033	5.44306	0.00915379	Rv3618	Rv3618	similar bacterial luciferase alpha chains
MT1839	39.6182	44.7011	22.2702	18.7846	0.48718	-1.03747	5.30242	0.0212044	Rv1790	PPE	PPE-family protein
MT2745	63.6679	49.4831	26.8352	28.3965	0.488012	-1.03501	5.60452	0.0169068	Rv2671	ribD	probable riboflavin deaminase
MT0210	171.717	116.916	68.2612	73.0405	0.489502	-1.03061	6.98209	0.0438432	Rv0200	Rv0200	probable membrane protein
MT0607	422.671	414.369	243.991	167.159	0.491226	-1.02554	8.44098	0.0396342	Rv0578c	PE_PGRS	PE_PGRS-family protein
MT3435	10.1079	6.65319	4.22366	4.09846	0.495586	-1.01279	3.03734	0.0279243	Rv3332	nagA	N-acetylglucosamine-6-P-deacetylase
MT0116	263.153	255.177	114.124	144.324	0.4986	-1.00404	7.72942	0.037709	Rv0107c	ctpI	probable magnesium transport ATPase
MT3536	66.282	54.3344	34.5146	25.713	0.499432	-1.00164	5.51623	0.0449686

## Sheet: 1B, Up>2x, p<0.05
Supplemental Dataset 1B: Upregulated gene expression tables of WT treated HC104A compared to DMSO
Gene	Counts per million (CPM)				WT DMSO/ WT HC104A
	WT_DMSO1	WT_DMSO2	WT_HC104A1	WT_HC104A2	Fold change	log2 Fold change	logCPM	Adjusted p-value	Rv number	Gene name	Annotated function
MT1221	75.5185	144.915	616.527	663.561	5.80792	2.53802	8.1573	3.41e-06	Rv1184c	Rv1184c	conserved hypothetical protein
MT2727	20.6804	25.296	136.01	104.706	5.23779	2.38896	5.64722	2.79e-11	Rv2650c	Rv2650c	phiRV2 phage related protein
MT2736.1	4.82156	2.77216	20.0091	19.4677	5.16006	2.36739	3.28863	9.98e-09
MT3573.13	1.91701	2.49495	14.4202	7.75781	5.04142	2.33383	2.21181	1.46e-06
MT3553	5.80911	9.00952	38.4823	35.6176	5.01268	2.32558	3.98258	2.65e-09	Rv3447c	Rv3447c	probable membrane protein
MT2726	3.83401	11.0886	32.5094	41.3262	4.96568	2.31199	3.82293	8.45e-06
MT2083	8.36512	5.96015	48.8921	21.4194	4.90111	2.29311	4.16142	0.00070419
MT1430	57.8588	57.0372	336.784	202.142	4.69032	2.22968	6.8422	1.39e-06	Rv1386	PE	PE-family protein
MT3140	5.80911	4.98989	13.9082	36.3983	4.64705	2.21632	3.51979	4.59e-05	Rv3054c	Rv3054c	conserved hypothetical protein
MT2729	8.24894	8.17788	38.9089	31.0312	4.25581	2.08943	3.88191	9.8e-07	Rv2652c	Rv2652c	phiRV2 phage related protein
MT0385	11.5601	14.9697	67.4079	43.6194	4.18854	2.06645	4.6766	6.99e-07	Rv0370c	Rv0370c	putative CO dehydrogenase gene cluster
MT2182.1	3.9502	5.05919	10.2392	25.2739	3.93995	1.97818	4.43816	0.00533802
MT3573.14	13.1867	14.2766	72.1862	35.8616	3.93523	1.97645	4.49878	1.05e-05	Rv1574	Rv1574	phiRV1 phage related protein
MT1579	2.14937	3.88103	11.2204	12.3442	3.93208	1.97529	2.47436	4.08e-06	Rv1528c	papA4	PKS-associated protein, unknown function
MT0910.2	1.74273	2.70286	8.362	8.78242	3.87769	1.9552	2.08854	4.84e-06
MT3760	4.12447	3.60381	10.1112	19.9068	3.86959	1.95218	2.85625	1.62e-05	Rv3660c	Rv3660c	involved in differentiation inhibition between
MT1431	714.463	641.894	3711.79	1496.92	3.84019	1.94118	10.1495	0.00159352	Rv1387	PPE	PPE-family protein
MT1207	74.7052	112.411	396.086	321.388	3.83501	1.93923	7.4855	1.45e-05	Rv1170	Rv1170	similar to S. lincolnensis lmbE
MT0726	1.56846	2.70286	8.06335	7.85539	3.75046	1.90707	2.00423	0.000102165
MT3759	2.84647	1.52469	6.01552	10.4901	3.727	1.89801	2.20656	8.58e-05	Rv3659c	trbB	similar to conjugal transfer proteins
MT3505	29.2198	39.0875	151.071	99.1926	3.66532	1.87394	5.93067	4.99e-06	Rv3397c	phyA	phytoene synthase
MT1222	248.049	555.264	1409.89	1525.56	3.6543	1.8696	9.62689	0.00702816	Rv1185c	fadD21	acyl-CoA synthase
MT1220	79.3525	182.2	440.541	512.894	3.6458	1.86623	8.06354	0.00195053	Rv1183	mmpL10	conserved large membrane protein
MT1396	6.73857	11.7124	34.8985	30.5433	3.55338	1.82919	4.00028	0.000263132	Rv1353c	Rv1353c	transcriptional regulator (TetR/AcrR family)
MT3554	6.39002	5.47502	22.2702	19.8092	3.53917	1.82341	3.42673	5.33e-07	Rv3448	Rv3448	probable membrane protein
MT1160	66.1077	67.2249	243.607	222.976	3.49926	1.80705	6.87468	1.66e-06	Rv1128c	Rv1128c	REP-family protein
MT0916	100.207	144.845	464.688	387.207	3.47673	1.79773	7.6253	0.000187386	Rv0892	Rv0892	putative monooxygenase
MT1216	7.26139	9.21744	27.1765	29.6651	3.4521	1.78747	4.01357	2.41e-05
MT3267	1.16182	1.24747	3.28507	5.0255	3.43235	1.77919	1.71923	0.000187386	Rv3178	Rv3178	conserved hypothetical protein
MT1398	15.5103	18.4349	60.9231	52.6945	3.34868	1.74359	4.81182	2.69e-06	Rv1355c	moeY	weak similarity to E. coli MoeB
MT0910.4	2.78837	4.08894	12.7136	9.4655	3.24031	1.69613	2.41444	5.39e-05
MT1703	45.6015	37.2163	173.81	93.484	3.22677	1.69009	6.12083	8.91e-05	Rv1663	pks17	polyketide synthase
MT0915.1	2.90456	8.10857	18.3879	16.0523	3.14096	1.65121	3.304	0.00639532
MT3500	17.6597	21.6229	66.384	54.8901	3.08895	1.62712	5.01792	1.33e-05	Rv3393	iunH	probable inosine-uridine preferring nucleoside
MT1569	7.8423	9.28674	20.6063	32.2022	3.08213	1.62393	4.33715	0.0375825	Rv1519	Rv1519	conserved hypothetical protein
MT1218	332.397	659.774	1322.13	1688.91	3.03488	1.60164	9.84902	0.0129723	Rv1180	pks3	polyketide synthase
MT2924	1.3361	1.38608	4.26632	3.85451	2.97983	1.57523	1.29056	0.000397853
MT1770	60.3567	84.8281	246.423	184.528	2.96893	1.56994	6.76095	0.000465917	Rv1729c	Rv1729c	conserved hypothetical protein
MT2391	93.4105	214.773	336.314	577.542	2.96554	1.5683	8.02956	0.0267428	Rv2329c	narK1	probable nitrite extrusion protein
MT0272	8.36512	7.20762	27.7738	17.8088	2.9245	1.54819	3.75613	0.00043224	Rv0259c	Rv0259c	conserved hypothetical protein
MT1394	59.6596	69.5812	210.842	160.767	2.87573	1.52393	6.57127	7.34e-05	Rv1351	Rv1351	hypothetical protein
MT0915	101.543	166.26	424.201	339.929	2.85365	1.51281	7.64028	0.00586469	Rv0891c	Rv0891c	putative transcriptional regulator
MT2150	36.0165	29.1077	107.426	77.2853	2.83512	1.50341	5.58223	8.36e-05	Rv2089c	pepE	cytoplasmic peptidase
MT0033	2.09128	2.07912	5.58889	6.1477	2.80699	1.48903	1.84067	0.000654423
MT1217	41.3028	59.1856	143.135	137.738	2.79597	1.48335	6.35172	0.000493725	Rv1179c	Rv1179c	hypothetical protein
MT3263	2.20746	3.88103	4.82095	12.0514	2.77571	1.47285	2.74846	0.0280097	Rv3174	Rv3174	putative oxidoreductase
MT1717	4.24065	4.85128	13.3536	11.6123	2.74924	1.45903	3.06097	0.00020201
MT2505	240.439	559.838	1183.99	1006.76	2.73764	1.45293	9.11038	0.018262	Rv2430c	PPE	PPE-family protein
MT2733	4.29874	1.94051	10.2818	6.78198	2.71526	1.44109	2.38572	0.0187743
MT3757	1.62655	1.59399	4.73562	4.00088	2.7085	1.43749	1.51848	0.00159352
MT2899	12.4896	8.663	29.0537	28.2989	2.70519	1.43573	4.03544	0.00043224	Rv2833c	ugpB	sn-glycerol-3-phosphate-binding periplasmic
MT2040	22.8298	20.0982	65.5734	50.4501	2.70174	1.43389	5.19268	0.000586676	Rv1986	Rv1986	membrane protein, LYSE/YGGA family
MT2394	40.8381	63.829	121.121	159.255	2.67942	1.42192	6.34678	0.00375981	Rv2332	mez	probable malate oxidoreductase
MT2589.1	34.6223	51.9087	128.886	102.462	2.67465	1.41935	5.96197	0.00276425
MT1054.1	35.9584	44.7704	151.668	62.16	2.64937	1.40565	5.8945	0.014573
MT1065	18.3568	16.3558	49.4894	41.9605	2.63311	1.39677	4.66753	0.000187386	Rv1035c	Rv1035c	hypothetical protein
MT3643	35.2032	45.8793	113.484	99.4853	2.6275	1.39369	5.8196	0.000509978	Rv3539	PE	PE-family protein
MT3077	1.68464	1.8019	3.58371	5.61099	2.62749	1.39369	1.52824	0.00427012
MT1582	36.1908	55.2353	112.631	127.199	2.62424	1.3919	6.08943	0.00114812	Rv1531	Rv1531	conserved hypothetical protein
MT3266	3.31119	6.7918	10.6658	15.7108	2.6213	1.39028	3.21196	0.00592947	Rv3177	Rv3177	probable non-heme haloperoxidase
MT0806	8.13276	6.44528	23.0808	14.9789	2.60692	1.38235	3.4073	0.00110153
MT0914	93.5848	130.846	305.981	277.769	2.60132	1.37924	7.35694	0.00383903	Rv0890c	Rv0890c	transcriptional regulator (LuxR/UhpA family)
MT1704	42.4065	53.3641	140.021	108.219	2.59281	1.37452	6.08839	0.000443349	Rv1664	pks9	polyketide synthase
MT1206	36.2489	96.6098	133.664	208.241	2.57417	1.36411	7.01166	0.0449686	Rv1169c	PE	PE-family protein
MT2952	17.6016	21.3456	52.6464	46.9372	2.55805	1.35505	4.85548	0.00113805
MT2393	34.7966	63.4132	135.712	115.245	2.55643	1.35413	6.45778	0.0106032	Rv2331	Rv2331	hypothetical protein
MT3506	12.0249	15.1083	41.8526	27.1767	2.54673	1.34865	4.50839	0.00171721	Rv3398c	idsA	geranylgeranyl pyrophosphate synthase
MT1389	27.7095	43.1764	81.0175	98.8023	2.53732	1.3433	6.06077	0.0389429	Rv1347c	Rv1347c	possible aminoglycoside 6'-N-acetyltransferase
MT2116	2.09128	3.32659	6.78346	6.83077	2.52821	1.33812	2.07493	0.00308825	Rv2055c	rpsR2	30S ribosomal protein S18
MT3931	148.539	314.502	408.415	757.386	2.51785	1.33219	8.61183	0.0492384	Rv3823c	mmpL8	conserved large membrane protein
MT2340	12.4896	14.9004	33.8746	33.8611	2.47437	1.30706	4.35596	0.000841612	Rv2282c	Rv2282c	transcriptional regulator (LysR family)
MT3076	4.93775	8.24718	16.2974	16.0035	2.45735	1.2971	3.36082	0.00572965
MT1227	6.73857	6.7918	16.2547	16.9794	2.45485	1.29564	3.33075	0.000825688	Rv1190	Rv1190	conserved hypothetical protein
MT3997	122.049	170.627	320.06	396.429	2.44821	1.29173	7.66936	0.0108943	Rv3882c	Rv3882c	conserved hypothetical protein
MT3921	2.14937	2.49495	5.16225	6.0989	2.42537	1.27821	2.09818	0.00375981	Rv3812	PE_PGRS	PE_PGRS-family protein
MT2138	5.2282	4.85128	11.1778	13.2224	2.41566	1.27242	2.91508	0.00139947
MT0718	114.904	134.796	363.662	236.979	2.4056	1.2664	7.53964	0.0106032	Rv0690c	Rv0690c	hypothetical protein
MT3494.1	56.0579	47.6812	144.159	105.243	2.40371	1.26526	5.98681	0.00269445	Rv3387	Rv3387	hypothetical protein
MT0201	74.589	81.4322	222.361	151.546	2.39668	1.26104	6.91489	0.00593166	Rv0191	Rv0191	probable chloramphenicol resistance protein
MT2506	111.709	192.18	371.981	345.003	2.35972	1.23862	7.5559	0.0102502
MT3927	58.4978	69.7199	152.606	148.911	2.35187	1.23381	6.44739	0.00351969
MT0407.1	64.3069	80.7392	150.559	190.432	2.35115	1.23336	6.60804	0.00276425
MT3998	131.983	172.636	341.647	371.643	2.34171	1.22756	7.78144	0.012042	Rv3883c	Rv3883c	probable secreted protease
MT3107	12.5477	14.4152	37.245	25.5666	2.33124	1.2211	4.03238	0.00419902	Rv1047	Rv1047	possible IS1081 transposase
MT2835	43.5103	42.0675	108.621	89.2392	2.3119	1.20908	5.83579	0.00375981	Rv2765	Rv2765	hypothetical protein
MT1488	4.41493	3.81172	9.1726	9.90462	2.31162	1.2089	2.66052	0.00296106
MT0990	4.18256	5.33641	14.1215	7.8066	2.31063	1.20829	2.71453	0.0131243	Rv0962c	Rv0962c	hypothetical protein
MT3507	51.8173	64.3141	133.067	135.201	2.31041	1.20815	6.37693	0.00375981	Rv3399	Rv3399	conserved hypothetical protein
MT2507	3.2531	3.95033	8.06335	8.53847	2.30821	1.20677	2.32751	0.00538584	Rv2433c	Rv2433c	hypothetical protein
MT2092	13.7095	11.9896	27.6458	30.8849	2.27517	1.18597	4.06591	0.00384352
MT3510.1	2.73028	4.57407	6.22883	10.295	2.26857	1.18179	2.93288	0.0291722
MT2587	10.9211	15.1776	36.5197	22.444	2.26268	1.17803	3.99	0.0108189
MT1399	4.70538	7.62344	16.2547	11.5147	2.26135	1.17718	2.94697	0.0117585	Rv1356c	Rv1356c	hypothetical protein
MT3573.15	3.31119	2.63355	7.12476	6.34286	2.25572	1.17359	1.99458	0.00672607	Rv1573	Rv1573	phiRV1 phage related protein
MT2139	7.14521	8.45509	16.5107	18.6383	2.25433	1.1727	3.38804	0.00566781
MT1238	88.7052	109.223	249.836	195.75	2.25152	1.1709	7.10638	0.00834246	Rv1200	Rv1200	probable sugar transporter
MT1237	12.6639	16.0785	37.5437	26.5424	2.23205	1.15837	4.10484	0.00752908
MT3575	13.4771	19.4744	44.5831	28.3965	2.2176	1.149	4.41291	0.0141668	Rv3469c	mhpE	probable 4-hydroxy-2-oxovalerate aldolase
MT3623	48.3318	52.4632	117.068	106.17	2.21495	1.14727	6.2218	0.0031357	Rv3523	Rv3523	lipid carrier protein
MT2628	3.77592	3.4652	8.87396	7.17231	2.21333	1.14622	2.56216	0.00830522
MT0868	4.18256	4.50476	11.3484	7.75781	2.20212	1.13889	2.60684	0.0148324
MT1765	20.6804	30.5631	60.0272	52.6945	2.20168	1.1386	5.02398	0.00624511	Rv1724c	Rv1724c	hypothetical protein
MT0128	154.987	207.496	420.916	375.449	2.19712	1.13561	7.83031	0.0199128	Rv0120c	fusA2	elongation factor G
MT3078	27.3028	35.553	58.534	78.6027	2.18219	1.12577	5.37366	0.0193217	Rv2999	lppY	lipoproteinhighly similar to MTCY19H5.18c
MT3494	50.4812	49.4831	119.414	98.7047	2.1819	1.12559	5.93205	0.00747141	Rv3386	Rv3386	hypothetical protein
MT3190	84.2321	89.6101	186.097	191.847	2.17406	1.12039	6.90491	0.00820622	Rv3107c	Rv3107c	Some similarity to D-lactate dehydrogenase
MT2137	24.6887	30.5631	53.585	66.1609	2.1677	1.11617	5.18724	0.0138415	Rv2077c	Rv2077c	conserved hypothetical protein
MT1678	191.352	199.665	486.958	358.713	2.16278	1.11289	7.98179	0.0202482
MT2589	72.672	94.2535	193.691	166.232	2.15654	1.10872	6.78612	0.0139268
MT3196	2.43983	3.04938	6.6128	5.07429	2.13824	1.09643	1.7378	0.0151067	Rv3114	Rv3114	hypothetical protein
MT3080	6.09957	7.83136	13.7802	15.9547	2.13711	1.09566	3.27172	0.0102947	Rv3000	Rv3000	conserved hypothetical protein
MT1232	50.4231	51.0078	126.369	90.3614	2.13686	1.09549	6.15526	0.00747141
MT2777.1	37.2364	63.8983	91.0434	124.906	2.13589	1.09484	6.29229	0.0491741	Rv2704	Rv2704	conserved hypothetical protein
MT2177	4.00829	3.3959	6.6128	9.27034	2.13526	1.09441	2.37214	0.0141668	Rv2117	Rv2117	conserved hypothetical protein
MT0115	16.2655	13.1678	37.2877	25.5666	2.13409	1.09362	4.18013	0.0122711	Rv0106	Rv0106	conserved hypothetical protein
MT3485	33.5186	32.2957	76.1966	64.1117	2.1317	1.09201	5.44843	0.0102947	Rv3375	amiD	probable amidase, v. similar MTCY50.19
MT0910	29.336	33.1966	73.0395	60.1596	2.13065	1.0913	5.18732	0.00639532	Rv0887c	Rv0887c	hypothetical protein
MT3966	5.63484	3.60381	6.86878	12.9297	2.13054	1.09122	2.99212	0.0483227
MT1084	24.4564	29.177	54.6516	58.5007	2.11035	1.07748	5.23743	0.00586469	Rv1054	Rv1054	integrase-a
MT3191	2.78837	2.42564	5.41823	5.5622	2.09746	1.06865	1.70421	0.0153317	Rv3108	Rv3108	hypothetical protein
MT3926	296.381	395.865	737.136	708.205	2.08796	1.06209	8.77073	0.0483406	Rv3818	Rv3818	hypothetical protein
MT1668	158.415	171.458	436.061	252.495	2.08743	1.06173	7.73605	0.0382132	Rv1632c	Rv1632c	hypothetical protein
MT2160.1	47.6347	60.7796	107.127	118.855	2.08481	1.05992	6.14186	0.0148949
MT1711	7.72612	10.95	17.7479	21.0778	2.08202	1.05799	3.74331	0.014573	Rv1673c	Rv1673c	conserved hypothetical protein
MT1999	12.6058	12.4054	29.6083	22.2488	2.07347	1.05205	3.96252	0.0138415	Rv1949c	Rv1949c	conserved hypothetical protein
MT2825	9.12031	12.6133	22.6115	22.3464	2.07117	1.05044	3.80254	0.0264085
MT1414	43.1617	57.2451	100.856	106.267	2.06333	1.04498	6.08959	0.0207348	Rv1367c	Rv1367c	probable penicillin binding protein
MT0719	71.1035	91.8278	199.109	136.908	2.06272	1.04455	6.85819	0.028913	Rv0691c	Rv0691c	transcriptional regulator (TetR/AcrR family)
MT2725	3.13692	3.4652	6.2715	7.31869	2.05795	1.04121	2.2704	0.0194744
MT2925	75.3442	82.6797	174.066	150.96	2.05694	1.0405	6.74723	0.0156499
MT1581	9.12031	13.3757	23.1235	22.8831	2.04868	1.03469	3.91125	0.0161145	Rv1530	adh	alcohol dehydrogenase (Zn)
MT2509	78.2488	107.421	203.973	176.136	2.04757	1.03391	6.88608	0.0329898	Rv2435c	Rv2435c	hypothetical protein
MT1397	29.5684	27.9295	68.1332	49.5719	2.04703	1.03354	5.16983	0.0130112	Rv1354c	Rv1354c	conserved hypothetical protein
MT0412	62.8546	76.3037	159.646	124.857	2.04484	1.03199	6.44736	0.0161145	Rv0402c	mmpL1	conserved large membrane protein
MT2115	1.9751	2.21773	3.88236	4.68396	2.04187	1.02989	1.69722	0.030924
MT0614	2.84647	4.85128	7.72205	7.90418	2.03991	1.02851	2.25199	0.0478036
MT2942	25.6182	27.3058	65.7014	42.2044	2.03949	1.02821	5.08947	0.0193217
MT3576	13.5933	19.2665	37.0744	29.8602	2.03943	1.02817	4.40648	0.0219907
MT3029	45.5434	51.7701	85.4545	112.659	2.03583	1.02561	6.08705	0.0206517	Rv2955c	Rv2955c	conserved hypothetical protein
MT3275	2.78837	3.32659	5.93019	6.44044	2.02585	1.01852	2.24524	0.0229642	Rv3183	Rv3183	putative transcriptional regulator
MT2405	2.49792	4.71267	7.38074	7.12352	2.02518	1.01805	2.24368	0.0454503
MT2162	186.937	179.082	368.013	372.863	2.02409	1.01727	7.8407	0.0382513	Rv2102	Rv2102	conserved hypothetical protein
MT3192	3.71783	5.1285	8.66064	9.17275	2.02125	1.01525	2.36709	0.0328566	Rv3109	moaA	molybdenum cofactor biosynthesis, protein A
MT0639	3.89211	4.36615	8.74597	7.90418	2.01868	1.01341	2.59459	0.0193735
MT1018	95.1533	98.3424	202.394	188.09	2.01806	1.01297	6.96926	0.0194744	Rv0989c	grcC2	heptaprenyl diphosphate synthase II
MT2588	57.3359	78.5215	172.146	101.779	2.0169	1.01214	6.32716	0.033626
MT3569	29.6265	37.147	60.0272	74.2115	2.01079	1.00776	5.47843	0.0194744	Rv3463	Rv3463	probable neuraminidase
MT1850	19.4024	16.8409	32.1681	40.6431	2.00729	1.00525	4.43621	0.0249648	Rv1801	PPE	PPE-family protein

## Sheet: 1C, Down>2x, p<0.05
Supplemental Dataset 1C: Downregulated gene expression tables of WT treated HC106A compared to DMSO
Gene	Counts per million (CPM)				WT DMSO/ WT HC106A
	WT_DMSO1	WT_DMSO2	WT_HC106A1	WT_HC106A2	Fold change	log2 Fold change	logCPM	Adjusted p-value	Rv number	Gene name	Annotated function
MT1780	11882.1	9299.91	19.2416	41.4876	0.00286872	-8.44538	11.8767	1.28076e-21	Rv1738	Rv1738	conserved hypothetical protein
MT2090	34556.6	40794.6	79.7512	145.66	0.00299188	-8.38473	13.5836	7.7548e-21	Rv2031c	hspX
MT3216	28777.6	18951.9	57.0664	115.007	0.00360579	-8.11547	13.2027	2.65542e-16	Rv3130c	Rv3130c	conserved hypothetical protein
MT2089	10989.5	5332.18	20.2543	39.557	0.00366641	-8.09142	11.8071	3.19318e-18	Rv2030c	Rv2030c	conserved hypothetical protein
MT2701	26619.7	17627.7	50.6357	113.037	0.00369979	-8.07834	12.9977	2.08775e-17	Rv2626c	Rv2626c	conserved hypothetical protein
MT3217	13763.1	7215.24	30.2295	53.071	0.00397202	-7.97591	12.2263	8.56546e-16	Rv3131	Rv3131	conserved hypothetical protein
MT1774	1869.49	2195.34	6.78518	10.4014	0.00423671	-7.88284	9.7699	3.75541e-34	Rv1733c	Rv1733c	possible membrane protein
MT2091	6234.69	5325.74	19.2922	30.8104	0.00433669	-7.84919	11.158	2.19312e-25	Rv2032	Rv2032	conserved hypothetical protein
MT3212	14946.1	9900.77	46.6355	66.7426	0.00456397	-7.77549	12.3572	2.87554e-17	Rv3127	Rv3127	conserved hypothetical protein
MT0600	1141.78	1366.54	3.49386	8.35268	0.0047463	-7.71898	9.0721	9.27284e-36
MT2698	20457.5	13444.2	60.1552	107.285	0.00493975	-7.66135	12.8333	8.45151e-15	Rv2623	Rv2623	conserved hypothetical protein
MT2700	4427.24	2065.33	12.9121	22.8911	0.00551863	-7.50147	10.4558	1.72021e-15	Rv2625c	Rv2625c	conserved hypothetical protein
MT1861	10178	11000.6	43.3948	83.1328	0.00597601	-7.3866	12.1361	8.09018e-21	Rv1813c	Rv1813c	conserved hypothetical protein
MT2702	13466.9	8200.54	69.4215	65.5606	0.00623021	-7.3265	12.1053	2.90995e-14	Rv2627c	Rv2627c	conserved hypothetical protein
MT1779	2582.56	1008.3	9.06379	13.9474	0.00641515	-7.2843	9.64426	9.23743e-17	Rv1737c	narK2	nitrite extrusion protein
MT2699	3864.86	1688.73	13.9248	21.9061	0.00645599	-7.27515	10.2482	8.77225e-14	Rv2624c	Rv2624c	conserved hypothetical protein
MT2063	10858.9	8676.8	54.8891	81.7144	0.00699381	-7.1597	12.2279	5.84302e-18	Rv2007c	fdxA	ferredoxin
MT1778	8887.94	3684.06	34.1284	55.1198	0.00710092	-7.13778	11.3632	2.02042e-14	Rv1736c	narX	fused nitrate reductase
MT2088	2009.02	1084.05	9.92459	15.1688	0.00812195	-6.94396	9.30952	1.24718e-20
MT1777	92.3068	61.542	0.303814	0.945586	0.00838232	-6.89843	5.17278	8.88525e-21
MT2087	565.75	208.12	3.13941	3.34895	0.00840275	-6.89492	7.57682	4.93049e-20	Rv2028c	Rv2028c	conserved hypothetical protein
MT2052	9605.31	4994.95	82.7893	87.0333	0.0116324	-6.42571	11.3138	4.71674e-13	Rv1996	Rv1996	conserved hypothetical protein
MT3220	5926.11	4276.27	76.4599	73.7163	0.0147208	-6.086	11.273	1.51837e-16	Rv3134c	Rv3134c	conserved hypothetical protein
MT2053	3600.55	2535.7	42.1795	50.7465	0.015147	-6.04483	10.4121	7.62757e-18	Rv1997	ctpF	probable cation transport ATPase
MT2703	1189.42	694.218	19.4947	23.6003	0.0228883	-5.44925	8.39935	8.53073e-13	Rv2628	Rv2628	hypothetical protein
MT3210	7.14521	4.98989	0.253178	0.0393994	0.0234519	-5.41415	1.68991	8.22564e-13
MT3219	2219.2	1647.84	67.1935	53.5044	0.0312124	-5.00174	9.82598	2.85983e-14	Rv3133c	Rv3133c	two-component response regulator
MT0086	2358.04	1979.67	69.0671	79.8626	0.0343385	-4.86403	10.3158	3.28569e-19	Rv0079	Rv0079	hypothetical protein
MT1775	1844.86	680.427	61.2185	28.8404	0.0356599	-4.80955	10.0186	7.89787e-08
MT2061	1656.7	2117.17	91.2961	47.0035	0.036641	-4.7704	9.74871	7.41527e-16	Rv2005c	Rv2005c	conserved hypothetical protein
MT0087	457.351	296.067	13.0134	14.6566	0.0367518	-4.76604	8.17586	1.09571e-22	Rv0080	Rv0080	hypothetical protein
MT0596	1404.41	1164.1	50.18	55.8684	0.041295	-4.59789	9.16025	3.19318e-18	Rv0570	nrdZ	ribonucleotide reductase, class II
MT0599	486.629	612.37	19.4441	31.2437	0.0461714	-4.43686	8.01877	3.15904e-24	Rv0572c	Rv0572c	hypothetical protein
MT2060	2139.44	1977.66	141.78	72.2586	0.0519823	-4.26583	9.92246	3.81876e-13	Rv2004c	Rv2004c	hypothetical protein
MT2059	829.251	612.856	51.4965	31.6771	0.0576608	-4.11627	8.62175	1.06783e-15	Rv2003c	Rv2003c	conserved hypothetical protein
MT0602	278.489	249.079	14.5831	16.7842	0.0594956	-4.07107	6.78601	2.44656e-16	Rv0574c	Rv0574c	conserved hypothetical protein
MT3218	4103.56	3231.85	265.179	221.425	0.0663367	-3.91405	10.8619	1.82552e-09	Rv3132c	Rv3132c	sensor histidine kinase
MT0598	406.057	521.998	24.6596	38.4932	0.0681041	-3.87611	7.99704	3.51398e-19
MT2704	5745.45	4441.14	442.455	305.109	0.0733866	-3.76834	11.2741	6.36073e-09	Rv2629	Rv2629	hypothetical protein
MT0597	384.157	353.728	37.6223	36.6415	0.100655	-3.31251	7.62784	1.33759e-14	Rv0571c	Rv0571c	conserved hypothetical protein
MT2062	933.583	1071.93	100.259	103.384	0.101549	-3.29975	9.09752	5.52694e-15	Rv2006	otsB	trehalose-6-phosphate phosphatase
MT2705	446.663	337.996	52.0028	32.3863	0.107527	-3.21722	7.84963	6.16229e-09	Rv2630	Rv2630	hypothetical protein
MT0601	131.751	103.471	11.7475	14.9324	0.113559	-3.13848	5.75679	1.13023e-15	Rv0573c	Rv0573c	conserved hypothetical protein
MT2707	417.966	298.492	54.6865	32.4257	0.121568	-3.04016	7.61555	2.49995e-06	Rv2631	Rv2631	conserved hypothetical protein
MT3170	57.4521	56.6214	9.97523	6.8161	0.146892	-2.76717	4.49923	1.36684e-15	Rv3085	Rv3085	short chain alcohol dehydrogenase
MT0595	194.605	175.963	36.002	19.5027	0.149676	-2.74008	6.50854	6.18913e-10	Rv0569	Rv0569	conserved hypothetical protein
MT1776	35.4356	16.633	3.13941	5.04313	0.157651	-2.6652	4.00202	1.71574e-05	Rv1735c	Rv1735c	hypothetical protein
MT3169	60.1243	58.7005	11.5956	7.24949	0.158233	-2.65988	4.55822	8.37384e-14	Rv3084	lipR	probable acetyl-hydrolase
MT3326	191.817	227.109	30.1789	38.0992	0.163067	-2.61646	7.26802	1.49614e-10	Rv3229c	desA3	acyl-[ACP] desaturase
MT3168	278.547	278.117	50.0787	42.4726	0.166242	-2.58864	6.82279	1.05136e-13	Rv3083	Rv3083	probable monooxygenase
MT0356	1454.25	581.669	210.391	144.635	0.174373	-2.51975	8.88611	2.30158e-05	Rv0341	Rv0341	conserved hypothetical protein
MT1297	149.933	79.0759	28.356	23.2457	0.225227	-2.15055	6.06495	2.53592e-07	Rv1258c	Rv1258c	probable multidrug resistance pump
MT1860	332.107	260.722	57.7247	84.5906	0.24012	-2.05817	7.78993	1.09467e-05	Rv1812c	Rv1812c	probable dehydrogenase
MT2600	5721.4	6286.85	1304.78	1696.74	0.249957	-2.00025	11.6509	0.000711404	Rv2524c	fas	fatty acid synthase
MT1449	157.834	105.55	49.5217	16.7842	0.251658	-1.99047	6.64258	0.0493078	Rv1405c	Rv1405c	similar to phosphatidylethanolamine N-methyltransferase
MT0604	47.6928	23.8406	14.178	5.08253	0.268747	-1.89568	4.31683	0.0180583	Rv0575c	Rv0575c	possible oxidoreductase
MT2559	70.8712	74.4325	18.8365	21.2757	0.276238	-1.85601	5.74879	1.23975e-07	Rv2485c	lipQ	probable carboxlyesterase
MT3159	257.867	178.389	69.9279	53.7802	0.283554	-1.81831	7.83906	0.0239158	Rv3074	Rv3074	conserved hypothetical protein
MT3327	130.008	116.5	40.863	29.5102	0.285346	-1.80921	6.69541	1.31052e-06	Rv3230c	Rv3230c	similar to various oxygenases
MT2093	100.556	78.7294	27.799	24.0731	0.289228	-1.78972	6.31962	8.21375e-07
MT0357	749.376	457.337	210.898	158.543	0.306134	-1.70776	8.37126	0.000801057	Rv0342	Rv0342	conserved hypothetical protein
MT2489	105.261	145.053	32.7106	43.891	0.30622	-1.70736	6.53251	2.70881e-05	Rv2416c	Rv2416c	conserved hypothetical protein
MT3173	250.838	223.02	101.221	47.1611	0.313038	-1.67559	6.91309	0.00202525
MT3171	420.464	381.796	169.933	92.3523	0.326885	-1.61314	7.61672	0.00235738	Rv3086	adhD	zinc-containing alcohol dehydrogenase
MT1882	140.116	62.8588	35.1412	32.8197	0.334774	-1.57874	5.86522	0.0180583	Rv1834	Rv1834	conserved hypothetical protein
MT0088	43.336	54.0571	18.1782	15.287	0.343576	-1.5413	5.17018	5.39472e-05	Rv0081	Rv0081	transcriptional regulator (ArsR family)
MT3480	114.73	169.518	54.4334	45.9791	0.353279	-1.50112	7.40352	0.0420896	Rv3370c	dnaE2	DNA polymerase III [alpha] chain
MT3349	89.9832	205.625	34.7361	72.0222	0.361398	-1.46834	6.46131	0.0161221	Rv3251c	rubA	rubredoxin A
MT3290.1	63.2612	121.906	37.7742	29.6678	0.364261	-1.45695	5.84758	0.00367521
MT0077	40.8962	16.633	13.5704	7.64349	0.367813	-1.44296	4.36564	0.0141564	Rv0071	Rv0071	group II intron maturase
MT2166	70.0579	162.657	32.4575	54.2924	0.373068	-1.42249	6.2893	0.0117211	Rv2107	PE	PE-family protein
MT1727	44.5559	39.5033	17.0136	15.287	0.384142	-1.38029	5.01681	0.000790367	Rv1687c	Rv1687c	probable ABC transporter
MT3963	278.605	214.704	118.386	75.5287	0.393033	-1.34728	7.40772	0.0420896	Rv3848	Rv3848	probable membrane proteinprot
MT3209	14.7551	15.2469	5.6712	6.26451	0.398562	-1.32712	3.62118	0.000367113
MT2712	133.029	96.8177	52.7624	39.3206	0.400463	-1.32026	6.5817	0.00271418	Rv2634c	PE_PGRS	PE_PGRS-family protein
MT3850	69.8255	117.262	36.2045	39.36	0.404113	-1.30717	5.93975	0.00223481	Rv3742c	Rv3742c	possible monooxygenase-b
MT2419	38.224	46.8495	13.7223	21.2363	0.411535	-1.28091	4.93483	0.0159973	Rv2352c	PPE	PPE-family protein
MT1726	31.6597	44.5625	17.925	15.09	0.433203	-1.20689	4.82396	0.0105891	Rv1686c	Rv1686c	probable transmembrane protein
MT2422	84.116	104.718	31.5967	52.48	0.445561	-1.16631	6.01844	0.0343254
MT1848	41.1866	39.8498	20.4568	16.9812	0.461793	-1.11468	4.63583	0.0174116	Rv1799	lppT	probable lipoprotein
MT3849	53.2696	86.9766	27.5458	37.3113	0.46293	-1.11113	5.54616	0.0161221	Rv3741c	Rv3741c	possible monooxygenasemonoxygenase-a
MT1691	178.63	102.362	59.6995	70.8402	0.46456	-1.10606	6.88447	0.032523
MT0089	118.971	85.3133	49.066	48.6977	0.478503	-1.0634	6.43369	0.0217954	Rv0082	Rv0082	probable oxidoreductase subunit
MT0242	232.887	177.21	100.765	97.5136	0.483462	-1.04853	7.37877	0.0341553	Rv0232	Rv0232	transcriptional regulator (TetR/AcrR family)
MT1603	6.27384	6.9304	2.98751	3.42775	0.48794	-1.03522	2.53878	0.0283455	Rv1552	frdA	fumarate reductase flavoprotein subunit
MT3848	57.2779	77.2047	31.4954	34.5533	0.49141	-1.025	5.70302	0.0190717	Rv3740c	Rv3740c	conserved hypothetical protein
MT0090	69.7674	45.1169	30.5333	26.1218	0.492824	-1.02086	5.81439	0.0328529	Rv0083	Rv0083	probable oxidoreductase subunit
MT0475	19.6348	15.732	9.92459	7.72229	0.497965	-1.00588	3.8338	0.0404307	Rv0459	Rv0459	conserved hypothetical protein

## Sheet: 1D, Up>2x, p<0.05
Supplemental Dataset 1D: Upregulated gene expression tables of WT treated HC106A compared to DMSO
Gene	Counts per million (CPM)				WT DMSO/ WT HC106A
	WT_DMSO1	WT_DMSO2	WT_HC106A1	WT_HC106A2	Fold change	log2 Fold change	logCPM	Adjusted p-value	Rv number	Gene name	Annotated function
MT3941	55.8256	61.0569	134.185	118.907	2.16531	1.11457	6.48892	0.00861862	Rv3833	Rv3833	transcriptional regulator (AraC/XylS family)
MT3667	44.8464	48.0277	100.107	101.848	2.17459	1.12074	6.02667	0.0046679	Rv3562	fadE31	acyl-CoA dehydrogenase
MT0702	50.8297	34.2362	106.943	82.6206	2.22688	1.15502	5.81944	0.0182104	Rv0673	echA4	enoyl-CoA hydratase/isomerase superfamily
MT2502	1.10373	2.84147	4.10149	4.60973	2.24337	1.16567	1.70557	0.0430933
MT0704	32.1244	26.9593	72.6116	60.0841	2.24433	1.16628	5.46966	0.0033901	Rv0675	echA5	enoyl-CoA hydratase/isomerase superfamily
MT2849	14.6971	19.4051	40.5592	36.9567	2.27445	1.18552	4.53367	0.00469312	Rv2779c	Rv2779c	transcriptional regulator (Lrp/AsnC family)
MT0167	80.0496	102.154	215.556	200.858	2.28563	1.19259	6.8889	0.010213	Rv0158	Rv0158	transcriptional regulator (TetR/AcrR family)
MT2383	27.1286	25.0188	85.5237	36.7991	2.34372	1.2288	5.19873	0.0240722	Rv2320c	rocE	arginine/ornithine transporter
MT0468	40.3152	48.79	98.537	111.461	2.35741	1.2372	6.25919	0.00134555	Rv0452	Rv0452	putative transcriptional regulator
MT3720	36.5393	37.4242	89.1694	87.3485	2.38639	1.25483	5.44306	0.000533739	Rv3618	Rv3618	similar bacterial luciferase alpha chains
MT2466	423.252	466.416	1039.5	1097.94	2.40252	1.26455	9.33002	0.0278163
MT3762	3.71783	4.50476	14.3299	5.59472	2.41649	1.27291	2.61598	0.0418956
MT4005	139.07	222.674	324.98	555.256	2.4336	1.28309	7.77306	0.0373367	Rv3890c	Rv3890c	hypothetical protein
MT3266	3.31119	6.7918	11.6462	12.8836	2.44057	1.28722	3.21196	0.0161221	Rv3177	Rv3177	probable non-heme haloperoxidase
MT3525	160.912	301.542	565.904	567.825	2.45174	1.2938	8.44943	0.0420896	Rv3416	whiB3	WhiB transcriptional activator homologue
MT3131.1	9.70122	17.0488	34.2297	31.4407	2.45902	1.29808	4.44544	0.00469312
MT1583	16.7302	17.1874	43.2935	40.8572	2.48051	1.31064	4.86577	0.000339948	Rv1532c	Rv1532c	conserved hypothetical protein
MT0721	189.203	196.546	413.643	556.359	2.51465	1.33036	8.10914	0.00416543	Rv0694	lldD1	L-lactate dehydrogenase (cytochrome)
MT1147	1.80083	2.91077	3.44323	8.31328	2.51848	1.33255	1.93219	0.044359	Rv1116	Rv1116	hypothetical protein
MT2955	23.8755	26.89	65.4213	64.6939	2.56348	1.3581	5.45471	0.000165577	Rv2887	Rv2887	transcriptional regulator (MarR family)
MT3874	45.4854	85.244	135.147	200.425	2.56772	1.36049	6.96412	0.0420896	Rv3767c	Rv3767c	conserved hypothetical protein
MT4006	438.879	569.818	976.813	1661.2	2.61532	1.38699	9.36544	0.0373367	Rv3891c	Rv3891c	hypothetical protein
MT0720	260.481	322.056	577.247	950.275	2.62231	1.39084	8.68468	0.00871825	Rv0693	pqqE	coenzyme pqq synthesis protein E
MT0835	3.42738	4.29685	9.97523	10.559	2.66074	1.41183	2.95684	0.0343254
MT3226	851.616	784.868	2533.56	1822.03	2.66151	1.41225	10.1761	0.0139102	Rv3139	fadE24	acyl-CoA dehydrogenase
MT2389	92.8877	93.5604	267.711	230.605	2.67248	1.41818	7.07572	0.000367113	Rv2327	Rv2327	conserved hypothetical protein
MT3940	6.68048	8.03927	23.0899	16.9024	2.7166	1.4418	3.41056	0.000184497	Rv3832c	Rv3832c	hypothetical protein
MT3513	20.3319	23.702	47.952	72.1404	2.729	1.44837	5.12898	0.000251769
MT2504	200.821	305.7	452.683	933.963	2.7378	1.45302	8.65495	0.0134016	Rv2429	ahpD	member of AhpC/TSA family
MT0738	123.502	208.882	331.613	590.558	2.7747	1.47233	8.17416	0.0320592
MT1206	36.2489	96.6098	137.729	231.905	2.78325	1.47677	7.01166	0.04147	Rv1169c	PE	PE-family protein
MT1506	129.02	129.737	325.638	400.022	2.80441	1.4877	7.68224	0.00027264	Rv1459c	Rv1459c	conserved hypothetical protein
MT0701	239.219	218.377	651.631	632.558	2.80626	1.48865	8.39209	0.000367113	Rv0672	fadE8	acyl-CoA dehydrogenase (aka aidB)
MT2228	147.029	239.792	512.332	582.875	2.83156	1.5016	8.39239	0.0033621	Rv2172c	Rv2172c	hypothetical protein
MT0719.1	29.7427	43.6615	104.613	107.836	2.89547	1.5338	6.08946	0.000367113
MT2386	27.9999	19.2665	99.0434	44.7972	3.03945	1.60381	5.23336	0.0014088
MT0883	1057.2	1558.58	3637.82	4396.23	3.0714	1.6189	10.8455	0.0129752	Rv0860	fadB	hypothetical protein
MT3514	32.7634	41.1666	90.5366	136.874	3.07734	1.62169	6.03451	4.59899e-05	Rv3406	Rv3406	putative dioxygenasediooxygenase
MT1585	33.809	47.8891	99.2459	153.737	3.09791	1.63129	6.16169	0.000350575	Rv1534	Rv1534	transcriptional regulator (TetR/AcrR family)
MT3263	2.20746	3.88103	7.9498	10.8742	3.10455	1.63439	2.74846	0.016038	Rv3174	Rv3174	putative oxidoreductase
MT0999.1	24.2821	21.5536	84.5616	60.9115	3.17218	1.66547	5.36075	0.0033002	Rv0971c	echA7	enoyl-CoA hydratase/isomerase superfamily
MT1303	698.255	426.636	2319.16	1276.74	3.19655	1.67651	9.51066	0.0162499	Rv1265	Rv1265	hypothetical protein
MT0585	588.696	468.079	1688.95	1718.21	3.22403	1.68886	9.59504	0.000338353	Rv0559c	Rv0559c	possible exported
MT2573	114.672	99.7978	346.703	352.664	3.26065	1.70516	7.69692	0.00305834	Rv2498c	citE	citrate lyase [beta] chain
MT3441	115.892	71.0366	366.856	243.449	3.26375	1.70653	7.10879	8.93745e-05	Rv3338	Rv3338	conserved hypothetical protein
MT0342	7.60994	11.4352	31.3941	30.7316	3.26818	1.70849	4.90771	5.25544e-06	Rv0327c	Rv0327c	cytochrome P-450 monooxygenasemonoxygenase
MT2574	151.966	156.835	462.405	551.553	3.28348	1.71523	8.002	0.0180901	Rv2499c	Rv2499c	putative aldehyde dehydrogenase
MT0491	40.141	52.3938	124.817	183.01	3.32789	1.73461	6.30225	5.02323e-06	Rv0474	Rv0474	transcriptional regulator (PbsX/Xre family)
MT0882	559.185	891.874	2096.22	2808.19	3.37994	1.757	10.0534	0.00305834	Rv0859	fadA	[beta] oxidation complex, subunit (acetyl-CoA
MT0719.2	143.834	267.86	540.08	938.731	3.59234	1.84492	8.47043	0.00166902	Rv0692	Rv0692	hypothetical protein
MT2667	125.303	201.19	464.734	711.514	3.60305	1.84922	8.43701	0.000338353	Rv2590	fadD9	acyl-CoA synthase
MT1087	100.498	152.33	393.794	521.294	3.61991	1.85595	8.16282	2.70881e-05	Rv1057	Rv1057	conserved hypothetical protein
MT0851	43.0455	54.9581	202.644	157.283	3.67302	1.87697	6.40908	3.23481e-07	Rv0830	Rv0830	conserved hypothetical protein
MT2796	226.788	295.235	873.01	1080.41	3.74217	1.90387	8.67562	1.27979e-05	Rv2724c	fadE20	acyl-CoA dehydrogenase
MT1906	4.82156	3.81172	18.6339	14.1838	3.78335	1.91966	2.9748	4.44449e-07	Rv1858	modB	transport system permease, molybdate uptake
MT0074	15.5103	26.4048	49.2685	111.579	3.84128	1.94159	5.31666	0.000166397	Rv0068	Rv0068	probable oxidoreductase
MT3134	609.376	539.393	2450.01	2042.55	3.91067	1.96742	9.86703	1.89135e-05	Rv3049c	Rv3049c	Probable monooxygenase
MT1904	236.779	355.391	1130.24	1224.02	3.9758	1.99125	8.90288	4.06025e-05	Rv1856c	Rv1856c	short-chain dehydrogenase/reductase family
MT0083	39.502	37.9786	201.53	117.174	4.11204	2.03986	7.93971	3.15084e-06	Rv0077c	Rv0077c	probable oxidoreductase
MT1905	56.5808	76.0958	268.318	295.85	4.25313	2.08853	6.87344	7.10138e-09	Rv1857	modA	molybdate binding protein
MT1385	38.5144	66.1854	74.3332	372.797	4.27142	2.09472	7.41382	0.0141564
MT2577	194.257	170.28	703.684	897.558	4.39239	2.13501	8.39353	0.00935435	Rv2502c	accD1	acetyl/propionyl-CoA carboxylase, [beta] subunit
MT3267	1.16182	1.24747	5.06357	5.59472	4.41924	2.1438	1.71923	4.88528e-07	Rv3178	Rv3178	conserved hypothetical protein
MT0153	217.726	280.196	979.497	1248.13	4.47399	2.16156	8.9765	3.0541e-06	Rv0145	Rv0145	conserved hypothetical protein
MT2581	69.2446	41.9289	262.495	241.203	4.52863	2.17907	6.73583	1.41429e-06	Rv2506	Rv2506	transcriptional regulator (TetR/AcrR family)
MT3904	14.7551	24.6722	67.1429	119.341	4.73415	2.24311	5.34922	3.0789e-06	Rv3797	fadE35	acyl-CoA dehydrogenase
MT2580	21.8423	24.3257	82.4349	138.331	4.78341	2.25804	5.58224	4.75756e-10	Rv2505c	fadD35	acyl-CoA synthase
MT0908	1440.72	968.385	6641.43	5110.03	4.87786	2.28625	11.0139	2.67048e-05	Rv0885	Rv0885	unknown transmembrane protein
MT2579	357.435	354.144	1572.9	2352.62	5.51657	2.46377	9.46072	0.00820583	Rv2504c	scoA	3-oxo acid:CoA transferase, [alpha] subunit
MT0484	63.4355	94.2535	262.951	612.307	5.55138	2.47285	7.5848	2.255e-06
MT0909	123.095	90.5111	802.778	589.888	6.51842	2.70452	7.93439	1.83683e-11	Rv0886	fprB	ferredoxin, ferredoxin-NADP reductase
MT2526	14.5228	52.879	194.39	245.222	6.52606	2.70621	6.39175	5.8424e-05	Rv2450c	Rv2450c	conserved hypothetical protein
MT0154	95.6761	119.549	795.537	1141.52	9.00058	3.17002	8.43453	4.71674e-13	Rv0146	Rv0146	conserved hypothetical protein
MT1608	21.0871	29.7314	201.226	269.492	9.26876	3.21238	6.37027	3.51398e-19	Rv1557	mmpL6	conserved large membrane protein
MT0493	576.496	1019.12	4709.42	10412.2	9.47711	3.24445	11.332	2.62518e-06	Rv0475	Rv0475	possible exported protein
MT0483	251.128	330.303	1698.52	5037.49	11.5853	3.53423	10.1978	6.90358e-08	Rv0467	aceA	isocitrate lyase
MT0258	343.086	721.871	11229.4	15209.6	24.8268	4.63382	11.861	8.73059e-13	Rv0244c	fadE5	acyl-CoA dehydrogenase
MT0586	63.2032	65.2844	3441.4	3913.55	57.2383	5.83891	9.93064	1.00603e-32	Rv0560c	Rv0560c	methyl transferase
